# Supplementary material for: Evaluation of the Ability of Nutri-Score to Discriminate the Nutritional Quality of Prepacked Foods Using a Sale-Weighting Approach
Source: MDPI journal article supplement (doi:10.3390/foods10081689), 2021-07-22
Supplement: s1 [file s1]

**Supplementary Table S1.** Discriminating performance of Nutri-Score and agreement between Nutri-Score and adapted WHO Europe profile (N = 15,822).

| Category                                     | Nutri-Score    |                  | Nutri-Score: WHO Europe |                |
|----------------------------------------------|----------------|------------------|-------------------------|----------------|
|                                              | N <sup>a</sup> | MG <sup>b</sup>  | Cohen's kappa           | % of agreement |
| <b>Beverages (n = 1152)</b>                  | <b>5</b>       | <b>E (47.1%)</b> | <b>0.49</b>             | <b>79.5</b>    |
| Juices (n = 250)                             | 4              | C (55.2%)        | na                      | 20             |
| Nectars (n = 139)                            | 3              | E (84.9%)        | 0.43                    | 96.4           |
| Soft drinks (n = 598)                        | 4              | E (64.2%)        | 0.09                    | 94.8           |
| Coffee mixes (n = 33)                        | 2              | E (97%)          | na                      | 100            |
| Waters (n = 132)                             | 1              | A (100%)         | na                      | 100            |
| <b>Bread and bakery products (n = 1999)</b>  | <b>5</b>       | <b>E (40.1%)</b> | <b>0.57</b>             | <b>91.5</b>    |
| Bread (n = 190)                              | 4              | B (44.7%)        | 0.33                    | 66.3           |
| Crispy bread (n = 198)                       | 5              | D (44.9%)        | 0.7                     | 89.9           |
| Other (n = 84)                               | 5              | D (35.7%)        | 0.57                    | 82.1           |
| Biscuits (n = 1,012)                         | 5              | E (60.8%)        | na                      | 97.4           |
| Cakes, muffins and pastry (n = 515)          | 5              | D (49.1%)        | na                      | 91.5           |
| <b>Cereal and cereal products (n = 1636)</b> | <b>5</b>       | <b>A (61.2%)</b> | <b>0.84</b>             | <b>93.2</b>    |
| Cereal bars (n = 69)                         | 3              | D (42%)          | na                      | 100            |
| Breakfast cereals (n = 345)                  | 5              | C (42%)          | 0.59                    | 85.2           |
| Cereal flakes and bran (n = 31)              | 1              | A (100%)         | na                      | 96.8           |
| Unprocessed cereals and pasta (n = 1191)     | 5              | A (75.3%)        | 0.77                    | 95             |
| <b>Confectionery (n = 1,938)</b>             | <b>5</b>       | <b>E (62.7%)</b> | <b>na</b>               | <b>98.2</b>    |
| Chocolate and sweets (n = 1,758)             | 5              | E (69.1%)        | na                      | 98             |
| Jelly (n = 180)                              | 3              | D (96.1%)        | na                      | 100            |
| <b>Convenience foods (n = 571)</b>           | <b>5</b>       | <b>C (38.2%)</b> | <b>0.59</b>             | <b>80.6</b>    |
| Pizza (n = 52)                               | 3              | C (59.6%)        | 0.24                    | 90.4           |
| Ready meals (n = 264)                        | 5              | B (38.6%)        | 0.56                    | 77.7           |
| Pre-prepared salads and sandwiches (n = 83)  | 4              | C (33.7%)        | 0.54                    | 79.5           |
| Side dishes (n = 172)                        | 5              | C (35.5%)        | 0.64                    | 82.6           |
| <b>Dairy (n = 2578)</b>                      | <b>5</b>       | <b>D (38.3%)</b> | <b>0.39</b>             | <b>74.9</b>    |
| Cottage cheese (n = 76)                      | 4              | A (47.4%)        | 0.23                    | 80.3           |
| Cheese and processed cheese (n = 720)        | 5              | D (79%)          | 0.04                    | 75.8           |
| Cheese imitates (n = 6)                      | 2              | E (66.7%)        | na                      | 100            |
| Plain yoghurt (n = 226)                      | 4              | B (53.5%)        | 0.38                    | 80.5           |
| Flavoured yoghurt (n = 531)                  | 4              | C (51.4%)        | 0.06                    | 55.9           |
| Yoghurt imitates (n = 33)                    | 2              | B (57.6%)        | na                      | 6.1            |
| Milk and milk drinks (n = 172)               | 5              | B (54.7%)        | 0.62                    | 88.2           |
| Milk imitates (n = 149)                      | 4              | B (67.8%)        | 0.08                    | 36.2           |
| Cream (n = 124)                              | 3              | D (78.2%)        | na                      | 100            |
| Cream imitates (n = 27)                      | 3              | D (55.6%)        | na                      | 66.7           |
| Desserts (n = 121)                           | 5              | C (62%)          | na                      | 83.9           |
| Ice cream and edible ices (n = 393)          | 5              | D (64.4%)        | na                      | 98.7           |
| <b>Edible oils and emulsions (n = 492)</b>   | <b>3</b>       | <b>D (42.9%)</b> | <b>na</b>               | <b>26</b>      |
| Butter (n = 60)                              | 3              | E (76.7%)        | na                      | 100            |
| Margarine (n = 61)                           | 3              | D (68.9%)        | na                      | 55.7           |
| Cooking oils (n = 371)                       | 3              | C (49.6%)        | na                      | 9.2            |
| <b>Eggs (n = 29)</b>                         | <b>2</b>       | <b>A (62.1%)</b> | <b>na</b>               | <b>100</b>     |
| <b>Fish and fish products (n = 503)</b>      | <b>5</b>       | <b>D (32.8%)</b> | <b>0.57</b>             | <b>77.7</b>    |
| Canned fish and seafood (n = 358)            | 5              | D (38.5%)        | 0.46                    | 73.2           |
| Unprocessed chilled fish (n = 77)            | 4              | A (64.9%)        | na                      | 88.3           |
| Processed chilled fish products (n = 68)     | 4              | B (38.2%)        | 0.79                    | 89.7           |
| <b>Fruit and vegetables (n = 1822)</b>       | <b>5</b>       | <b>A (39.9%)</b> | <b>0.42</b>             | <b>70</b>      |

| Category                                   | Nutri-Score    |                  | Nutri-Score: WHO Europe |                |
|--------------------------------------------|----------------|------------------|-------------------------|----------------|
|                                            | N <sup>a</sup> | MG <sup>b</sup>  | Cohen's kappa           | % of agreement |
| Frozen vegetables (n = 127)                | 2              | A (99.2%)        | na                      | 100            |
| Canned vegetables (n = 620)                | 5              | A (64.4%)        | 0.33                    | 62.6           |
| Dried vegetables (n = 46)                  | 3              | A (87%)          | 0.19                    | 73.9           |
| Frozen fruit (n = 31)                      | 1              | A (100%)         | na                      | 100            |
| Canned fruit (n = 92)                      | 3              | B (77.2%)        | na                      | 8.7            |
| Dried fruit (n = 221)                      | 4              | C (57%)          | 0.1                     | 68.8           |
| Nuts and fruit mixes (n = 50)              | 4              | B (46%)          | 0.24                    | 62             |
| Jam and spreads (n = 296)                  | 4              | C (52.4%)        | 0.51                    | 96.3           |
| Nuts and seeds (n = 339)                   | 5              | C (38.9%)        | 0.34                    | 64.9           |
| <b>Meat and meat products (n = 1644)</b>   | <b>5</b>       | <b>E (41.7%)</b> | <b>0.54</b>             | <b>89.1</b>    |
| Unprocessed meat (n = 115)                 | 5              | A (50.4%)        | na                      | 73             |
| Processed meat and meat spreads (n = 1364) | 5              | D (45.7%)        | 0.27                    | 91.5           |
| Animal fat products (n = 61)               | 2              | E (95.1%)        | na                      | 95.1           |
| Meat alternatives (n = 104)                | 5              | A (42.3%)        | 0.45                    | 71.2           |
| <b>Snack foods (n = 485)</b>               | <b>5</b>       | <b>D (56.7%)</b> | <b>0.69</b>             | <b>98.6</b>    |
| <b>Sauces and spreads (n = 973)</b>        | <b>5</b>       | <b>C (33.8%)</b> | <b>na</b>               | <b>80.7</b>    |
| Sauces (n = 645)                           | 5              | C (40.6%)        | na                      | 74.9           |
| Mayonnaise and dressings (n = 104)         | 3              | E (48.1%)        | na                      | 100            |
| Sweet spreads (n = 80)                     | 2              | E (87.5%)        | na                      | 100            |
| Nut spreads (n = 44)                       | 5              | D (40.9%)        | na                      | 88.6           |
| Vegetable spreads (n = 100)                | 5              | C (44%)          | na                      | 79             |

<sup>a</sup>Number of different Nutri-Score grades in main category and subcategories.

<sup>b</sup>Main grade (MG): predominant Nutri-Score grade in main category and subcategories.  
na, not applicable.

**Supplementary Table S2.** Distribution of Nutri-Score grades in Slovenian food supply.

| Category                   | Offerings<br>full dataset (N = 15,822) |                |                |                |                 | Offerings<br>foods with sales data (N = 10,402) |              |              |              |              | Sale-weighted offerings<br>foods with sales data<br>(N = 10,402) |       |       |       |       |
|----------------------------|----------------------------------------|----------------|----------------|----------------|-----------------|-------------------------------------------------|--------------|--------------|--------------|--------------|------------------------------------------------------------------|-------|-------|-------|-------|
|                            | A<br>(n (%))                           | B<br>(n (%))   | C<br>(n (%))   | D<br>(n (%))   | E<br>(n (%))    | A<br>(n (%))                                    | B<br>(n (%)) | C<br>(n (%)) | D<br>(n (%)) | E<br>(n (%)) | A (%)                                                            | B (%) | C (%) | D (%) | E (%) |
| Beverages                  | 132<br>(11,5%)                         | 78 (6,8%)      | 176<br>(15,3%) | 223<br>(19,4%) | 543<br>(47,1%)  | 100 (12%)                                       | 60 (7.2%)    | 125 (15.1%)  | 143 (17.2%)  | 402 (48.4%)  | 53.1                                                             | 1.3   | 3.6   | 7.6   | 34.5  |
| Bread and bakery products  | 126<br>(6,3%)                          | 158<br>(7,9%)  | 206<br>(10,3%) | 707<br>(35,4%) | 802<br>(40,1%)  | 81 (5.9%)                                       | 118 (8.6%)   | 163 (11.9%)  | 485 (35.4%)  | 523 (38.2%)  | 6.1                                                              | 18.2  | 15    | 25.3  | 35.4  |
| Cereal and cereal products | 1001<br>(61,2%)                        | 176<br>(10,8%) | 249<br>(15,2%) | 164<br>(10%)   | 46<br>(2,8%)    | 794 (63.2%)                                     | 132 (10.5%)  | 174 (13.8%)  | 120 (9.5%)   | 37 (2.9%)    | 70.1                                                             | 18    | 7.6   | 2.4   | 1.8   |
| Confectionery              | 4 (0,2%)                               | 31 (1,6%)      | 78 (4%)        | 609<br>(31,4%) | 1216<br>(62,7%) | 4 (0.3%)                                        | 20 (1.6%)    | 49 (4%)      | 373 (30.2%)  | 788 (63.9%)  | 0                                                                | 0.7   | 0.4   | 20.7  | 78.2  |
| Convenience foods          | 87<br>(15,2%)                          | 161<br>(28,2%) | 218<br>(38,2%) | 97<br>(17%)    | 8<br>(1,4%)     | 53 (15.3%)                                      | 108 (31.2%)  | 133 (38.4%)  | 47 (13.6%)   | 5 (1.4%)     | 30.8                                                             | 30.9  | 26.8  | 11.5  | 0     |
| Dairy                      | 254<br>(9,9%)                          | 615<br>(23,9%) | 605<br>(23,5%) | 988<br>(38,3%) | 116<br>(4,5%)   | 170 (10.9%)                                     | 439 (28.2%)  | 285 (18.3%)  | 595 (38.2%)  | 68 (4.4%)    | 21.8                                                             | 61.6  | 7.3   | 8.8   | 0.4   |
| Edible oils and emulsions  | 0 (0%)                                 | 0 (0%)         | 203<br>(41,3%) | 211<br>(42,9%) | 78<br>(15,9%)   | 0 (0%)                                          | 0 (0%)       | 160 (43.1%)  | 154 (41.5%)  | 57 (15.4%)   | 0                                                                | 0     | 17.3  | 70.9  | 11.8  |
| Eggs                       | 18<br>(62,1%)                          | 11<br>(37,9%)  | 0 (0%)         | 0 (0%)         | 0 (0%)          | 13 (61.9%)                                      | 8 (38.1%)    | 0 (0%)       | 0 (0%)       | 0 (0%)       | 72.1                                                             | 27.9  | 0     | 0     | 0     |
| Fish and fish products     | 74<br>(14,7%)                          | 119<br>(23,7%) | 138<br>(27,4%) | 165<br>(32,8%) | 7<br>(1,4%)     | 30 (8.4%)                                       | 81 (22.6%)   | 100 (27.9%)  | 142 (39.6%)  | 6 (1.7%)     | 9.7                                                              | 19.8  | 24.8  | 45.1  | 0.6   |
| Fruit and vegetables       | 727<br>(39,9%)                         | 281<br>(15,4%) | 572<br>(31,4%) | 235<br>(12,9%) | 7<br>(0,4%)     | 498 (39.1%)                                     | 191 (15%)    | 416 (32.7%)  | 165 (13%)    | 4 (0.3%)     | 66.3                                                             | 14.6  | 14    | 5     | 0.1   |
| Meat and meat products     | 111<br>(6,8%)                          | 60 (3,6%)      | 124<br>(7,5%)  | 664<br>(40,4%) | 685<br>(41,7%)  | 51 (7%)                                         | 26 (3.6%)    | 67 (9.3%)    | 335 (46.3%)  | 245 (33.8%)  | 3.4                                                              | 2.3   | 10    | 66.7  | 17.7  |
| Snack foods                | 8 (1,6%)                               | 5 (1%)         | 48<br>(9,9%)   | 275<br>(56,7%) | 149<br>(30,7%)  | 6 (1.8%)                                        | 3 (0.9%)     | 40 (12%)     | 185 (55.6%)  | 99 (29.7%)   | 1.8                                                              | 0     | 9.2   | 54.1  | 34.8  |
| Sauces and spreads         | 68 (7%)                                | 120<br>(12,3%) | 329<br>(33,8%) | 281<br>(28,9%) | 175<br>(18%)    | 56 (7.7%)                                       | 90 (12.4%)   | 230 (31.6%)  | 222 (30.5%)  | 129 (17.7%)  | 6.9                                                              | 12.6  | 25.2  | 17.2  | 38.1  |
